# Supplementary material for: 4-aminopyridine promotes accelerated skin wound healing
Source: Research Square preprint supplement (doi:10.21203/rs.3.rs-1037729/v1), 2021-11-02
Supplement: Supplementary file 1 [file 14a9f3d321973e9a7891d4ae.docx]

**4-aminopyridine promotes accelerated skin wound healing**

Mashanipalya G Jagadeeshaprasad1, Prem Kumar Govindappa1, Amanda M. Nelson2, Mark D. Noble3 and John C. Elfar1*

1Department of Orthopaedics and Rehabilitation, Center for Orthopaedic Research and Translational Science (CORTS), The Pennsylvania State University College of Medicine, Hershey, PA 17033, USA

2Department of Dermatology, The Pennsylvania State University College of Medicine, Hershey, PA 17033, USA.

3Department of Biomedical Genetics, University of Rochester Stem Cell and Regenerative Medicine Institute, University of Rochester School of Medicine and Dentistry, Rochester, NY 14642, USA.

* Please address correspondence to:

**John C. Elfar, MD, FACS**

Department of Orthopaedics and Rehabilitation

Center for Orthopaedic Research and Translational Science

The Pennsylvania State University College of Medicine and Milton S. Hershey Medical Center

Hershey, PA 17033

Phone: 717-531-4686; Fax: 717-531-0349

E-mail: [openelfar@gmail.com](file:///C:\Users\jguddadarangaiah\Downloads\openelfar@gmail.com )and [jelfar@pennstatehealth.psu.edu](file:///C:\Users\jguddadarangaiah\Downloads\jelfar@pennstatehealth.psu.edu )

**Supplementary Information**

**
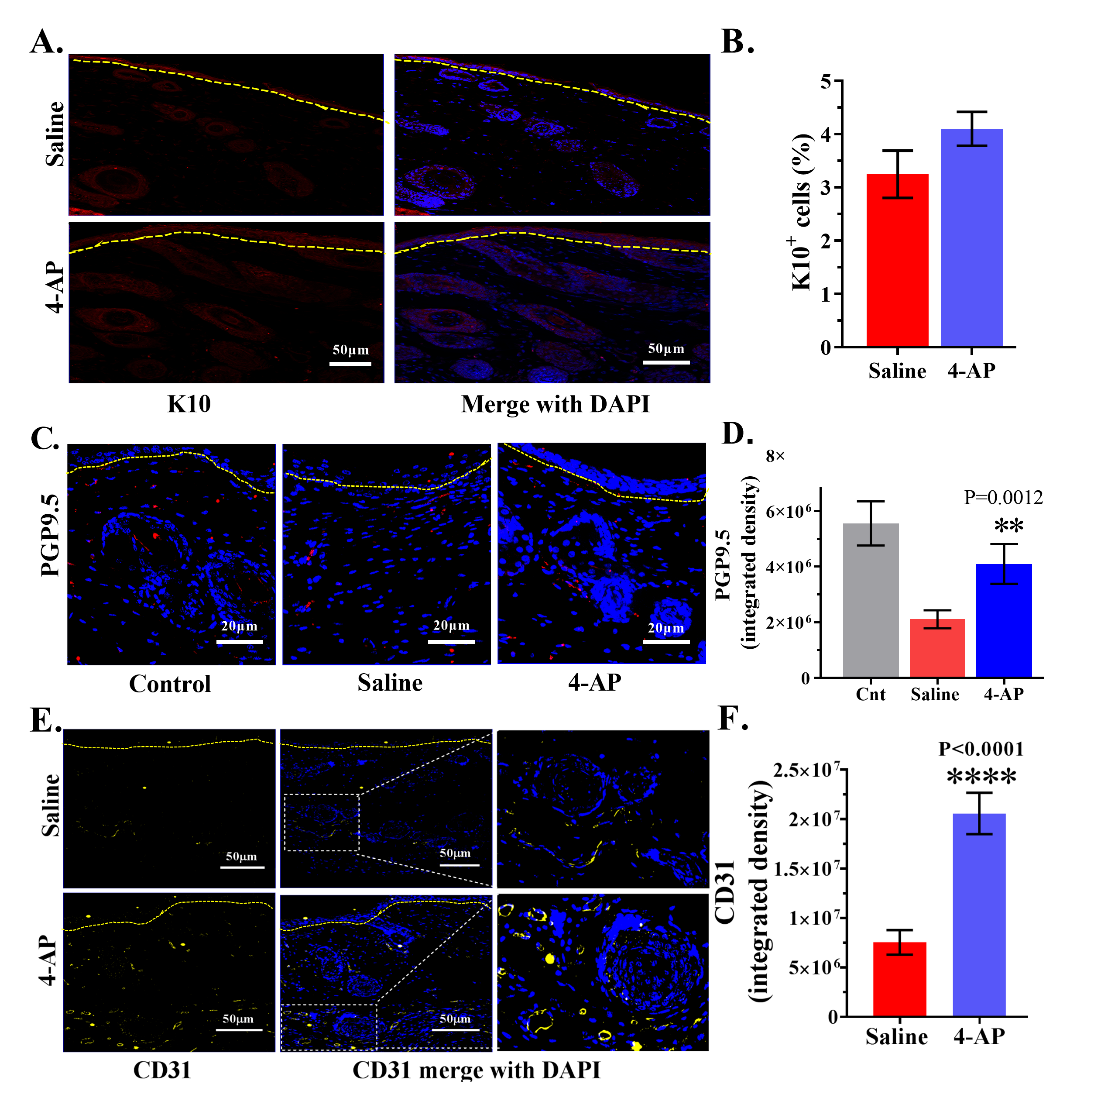
Supplementary Figures**

**Supplementary Fig. S1. 4-AP induced neo-angiogenesis and neuronal peptide wound healing and did not alter keratinocyte K10 expression. (A)** Keratin 10 protein expression in healed epidermis by immunofluorescence. 4-AP treatment did not cause any change in expression of keratinocyte K10 expression. Scale bars = 50 µm. **(B)** Percent of K10+ cells in control and 4-AP treated skin wounds at day 14. Mean ± SEM; N = 4 animals wound tissue/group and *P = 0.01 to 0.05, **P = 0.01 to 0.001, ***P < 0.0002, and ****P < 0.0001 unpaired t-test. **(C)** Immunofluorescence staining of control and healed wound sections for pan-neuronal marker PGP-9.5 (red) and nuclear stain DAPI (blue). Scale bars = 20 μm. **(D)** Quantification of PGP-9.5 protein expressing cells showed significantly increased PGP-9.5 intensity in the 4-AP treated group compared to the saline treated group at day 14. PGP 9.5 in 4-AP-treated mice was not significantly different from seen in uninjured (control) tissue. Mean ± SEM; N = 6 animal wound tissues/group and 4 control tissue, *P = 0.01 to 0.05, **P = 0.01 to 0.001, ***P < 0.0002, and ****P < 0.0001, unpaired t-test. **(E)** CD31 protein expression in healed skin by immunofluorescence. Scale bars = 100 µm. **(F)** Quantification of CD31 staining intensity, 4-AP treated group showed higher intensity compared to saline control group. Mean ± SEM, N = 6 animals wound tissue/group and *P = 0.01 to 0.05, **P = 0.01 to 0.001, ***P < 0.0002, and ****P < 0.0001 unpaired t-test.

**
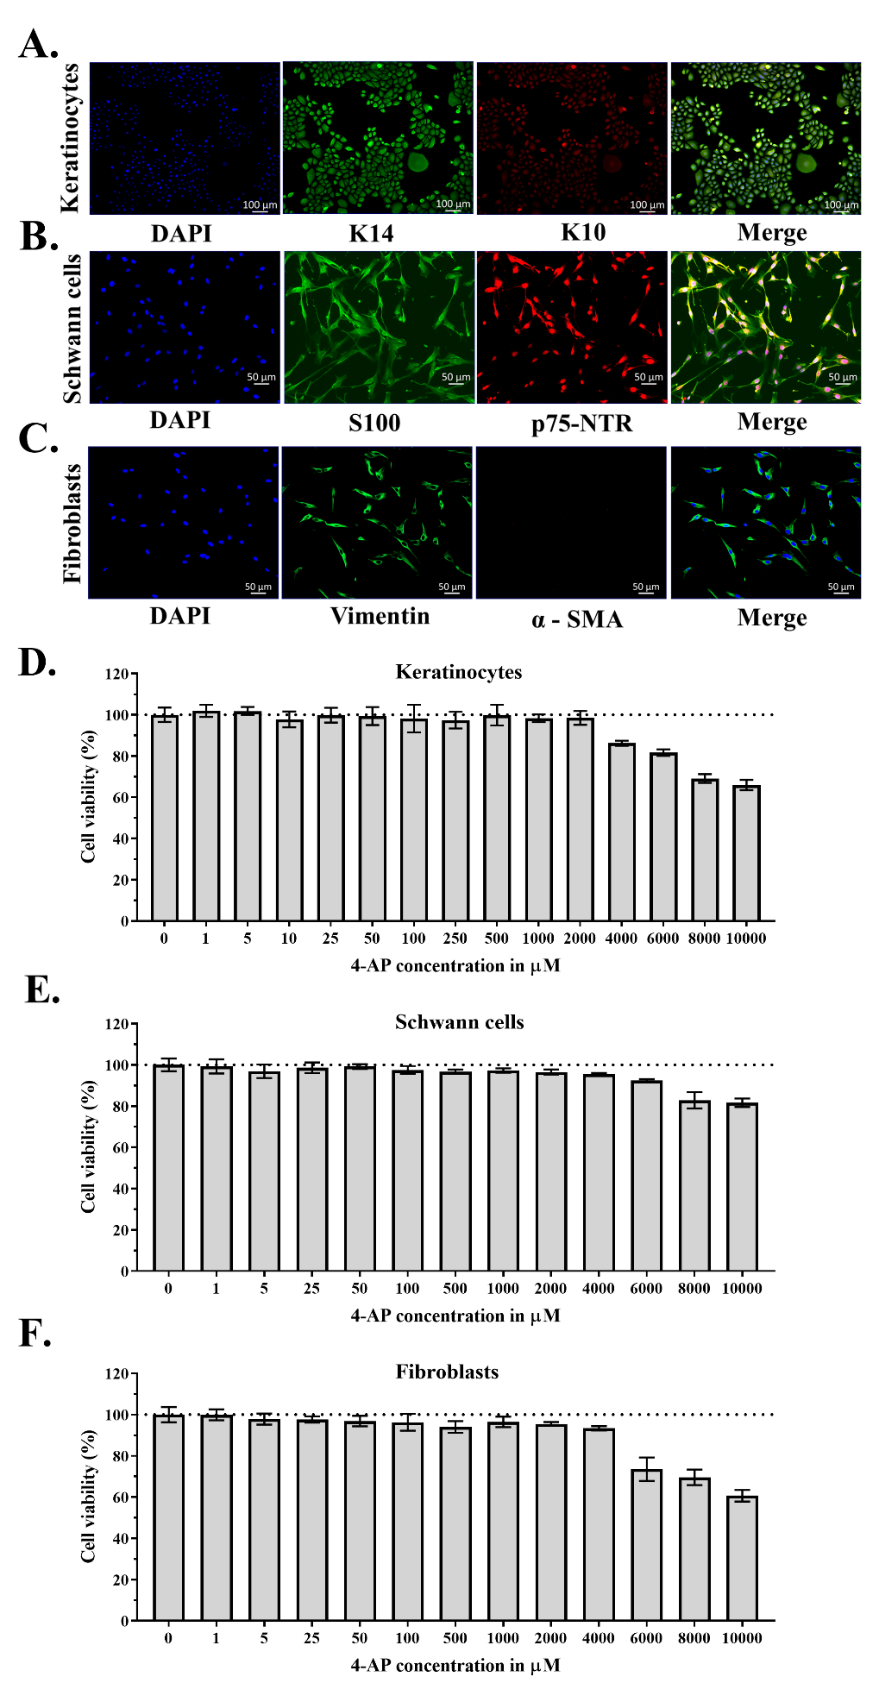
**

**Supplementary Fig. S2. Isolation and characterization of human skin derived primary keratinocytes, Schwann cells, and fibroblasts.** (A) Keratinocytes were characterized using keratin 14 (K14, a marker of proliferative keratinocytes) and K10 (keratin 10, a marker of keratinocyte differentiation marker). Scale bars = 100µm. **(B)** Schwann cells were identified using S100 (Schwann cells marker) and p75-NTR (nerve growth factor receptor marker). Scale bars = 50 µm. **(C)** Fibroblasts were characterized using vimentin (fibroblast marker) and α-smooth muscle actin (fibroblast differentiation, myofibroblast marker). Scale bars, 50 µm. **(D-F)** Cell viability using MTT assay with different concentrations of 4-AP (ranging from 1 to 10000 µM) for **(D)** Keratinocytes, **(F)** Schwann cells and **(F)** fibroblast. Mean ± SEM, N=3 replicates/concentration of 4-AP.


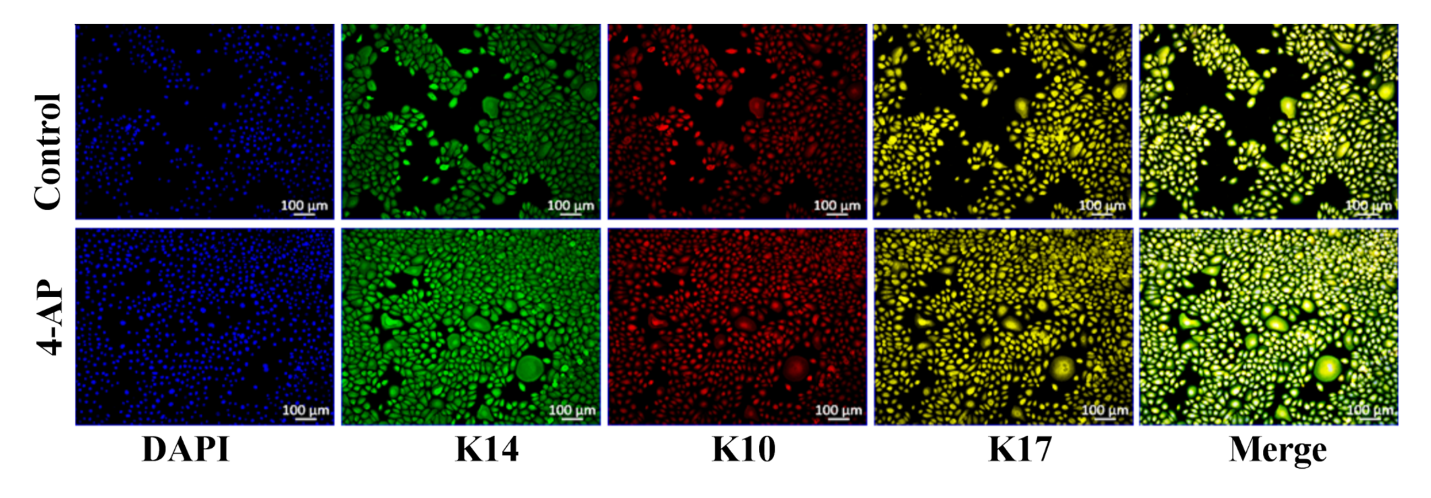
 **Supplementary Fig. S3. Effect of 4-AP on cultured keratinocytes.** Primary keratinocytes were exposed to 4-AP or no treatment for 24 hours and co-immunostained using antibodies against keratin 14 (proliferation-K14-green), keratin 10 (differentiation-K10-red) or keratin 17 (hyperproliferation-K17-yellow). DAPI (blue) was used as nuclear counterstaining. Scale bars = 100 µm.


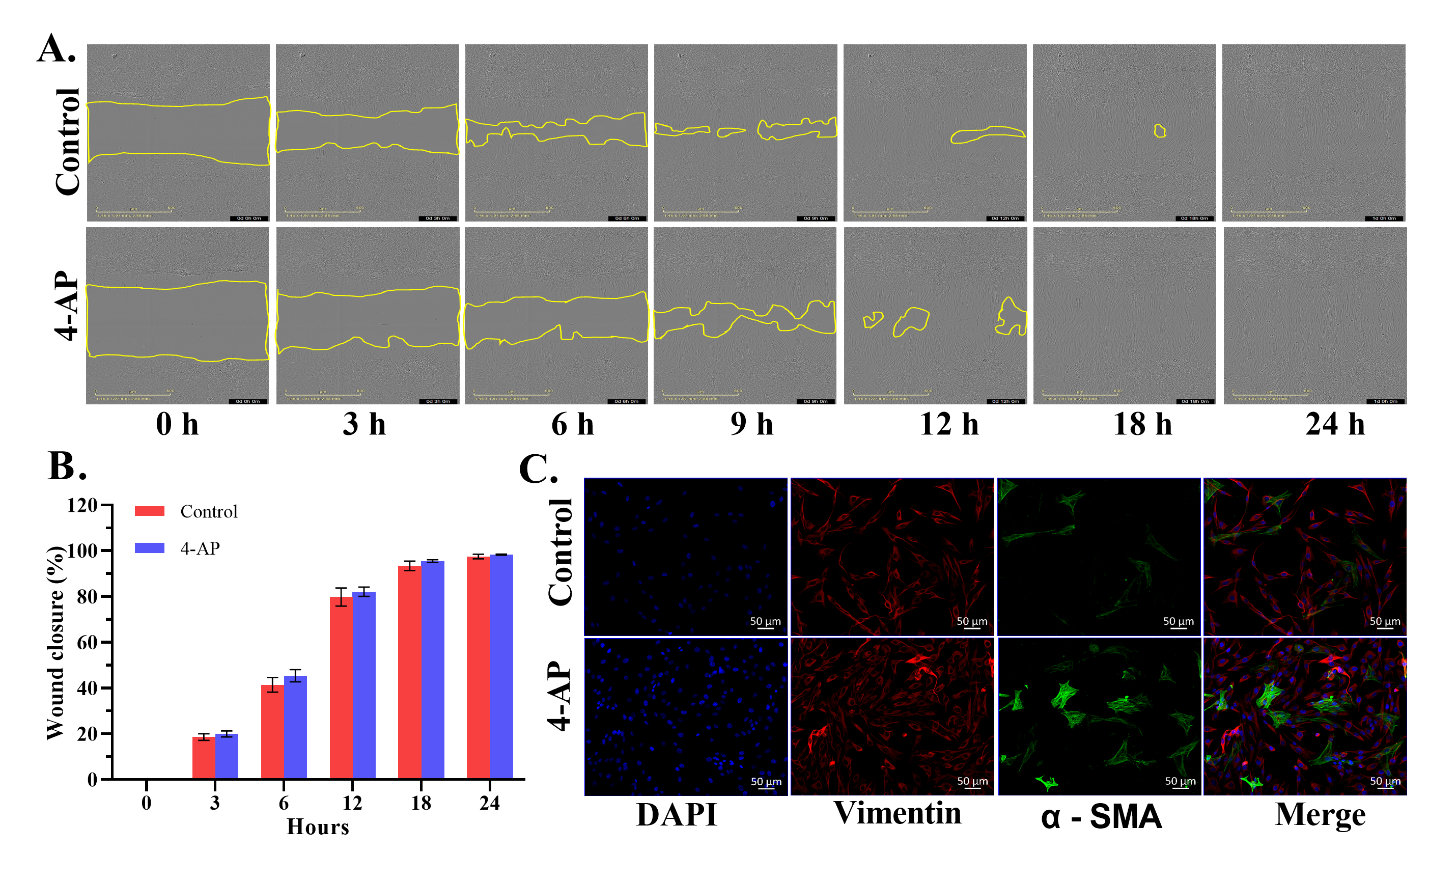


**Supplementary Fig. S4. Effect of 4-AP exposure on primary dermal fibroblasts.** **(A)** Representative images of *in-vitro* fibroblast scratch assays with 4-AP and vehicle control at indicated time points. Scale bar = 100 µm. **(B)** The relative percentage of wound closure was calculated as the ratio of the remaining wound gap at the given time point compared to time 0. Data expressed as means ± SEM, N = 4 wound scratch replicates/group, and *P = 0.01 to 0.05, **P = 0.01 to 0.001, ***P < 0.0002, and ****P < 0.0001 one-way ANOVA Sidak's multiple comparisons test. **(C)** Co-immunostained dermal fibroblasts exposed to 4-AP or no treatment for 72 hours and immunostained using antibodies against the fibroblast marker vimentin- (red), or the myofibroblast marker α-SMA (green). DAPI (blue) was used as nuclear counterstaining.

**
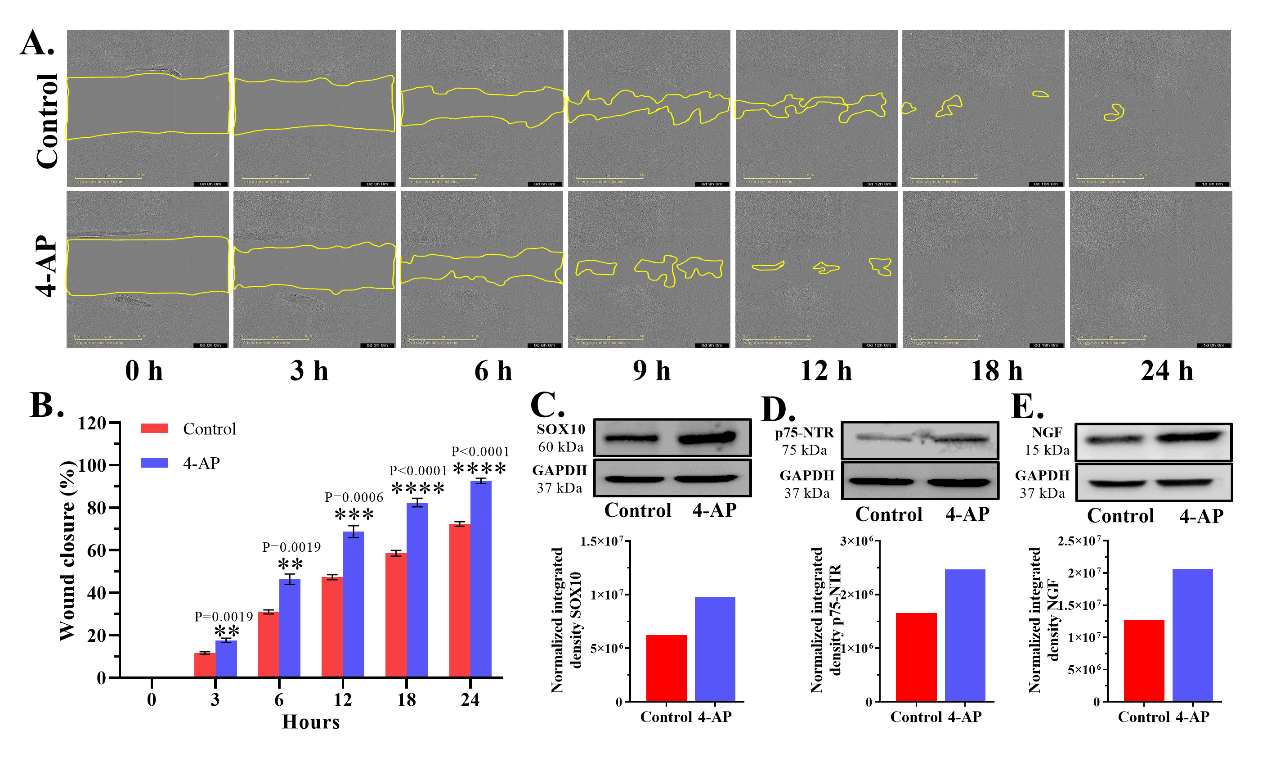
 Supplementary Fig. S5. Effect of 4-AP exposure on primary dermal Schwann cell in scratch wound healing assays.** **(A)** Representative images of *in-vitro* Schwann cells scratch assays with 4-AP and vehicle controls at indicated time points. Scale bar =100 µm. **(B)** The relative percentage of wound closure was calculated as the ratio of the remaining wound gap at the given time point compared to time 0. Mean ± SEM, N = 5 wound scratch replicates/group, and *P = 0.01 to 0.05, **P = 0.01 to 0.001, ***P < 0.0002, and ****P < 0.0001 one-way ANOVA Sidak's multiple comparisons test. **(C)** Co-immunostaining of dermal Schwann cells exposed to 4-AP or no treatment for 72 hours and immunostained against SC markers including the Schwann cell marker S100 (green), a de-differentiation marker p75-NTR (red) and myelin basic protein (MBP-yellow). DAPI (blue) was used as nuclear counterstaining. Scale bars, 100 µm. **(D - F)** A representative western blot and normalized integrated densities for SOX10, p75-NTR, NGF and GAPDH.

**Supplementary Movies**

**Supplementary Movie 1.** An example of time-lapse phase contrast images depicting the migration of keratinocytes without treatment (control) during wound scratch closure. Images were recorded every one hour. Scale bar = 100 µm.

**Supplementary Movie 2.** An example of time-lapse phase contrast images depicting the migration of keratinocytes after 4-AP treatment during wound scratch closure. Images were recorded every one hour. Scale bar = 100 µm.

**Supplementary Movie 3.** An example of time-lapse phase contrast images depicting the migration of fibroblasts without treatment (control) during wound scratch closure. Images were recorded every one hour. Scale bar = 100 µm.

**Supplementary Movie 4.** An example of time-lapse phase contrast images depicting the migration of fibroblasts after 4-AP treatment during wound scratch closure. Images were recorded every one hour. Scale bar = 100 µm.

**Supplementary Movie 5.** An example of time-lapse phase contrast images depicting the migration of Schwann cells without treatment (control) during wound scratch closure. Images were recorded every one hour. Scale bar = 100 µm.

**Supplementary Movie 6.** An example of time-lapse phase contrast images depicting the migration of Schwann cells after 4-AP treatment during wound scratch closure. Images were recorded every one hour. Scale bar = 100 µm.

**Supplementary Movie 7.** An example of time-lapse phase contrast images depicting the migration of co-cultured keratinocytes and Schwann cells without treatment (control) during wound scratch closure. Images were recorded every one hour. Scale bar = 100 µm.

**Supplementary Movie 8.** An example of time-lapse phase contrast images depicting the migration of co-cultured keratinocytes and Schwann cells after 4-AP treatment during wound scratch closure. Images were recorded every one hour. Scale bar = 100 µm.

**Supplementary Movie 9.** An example of time-lapse phase contrast images depicting the migration of co-cultured keratinocytes and fibroblasts without treatment (control) during wound scratch closure. Images were recorded every one hour. Scale bar = 100 µm.

**Supplementary Movie 10.** An example of time-lapse phase contrast images depicting the migration of co-cultured keratinocytes and fibroblasts after 4-AP treatment during wound scratch closure. Images were recorded every one hour. Scale bar = 100 µm.
